# Supplementary material
Source: bioRxiv or medRxiv preprint supplement (https://www.biorxiv.org/content/biorxiv/early/2020/10/16/2020.10.16.342675/DC1/embed/media-1.pdf)
Supplement: Supplementary file [file media-1.pdf]

## **Supplemental Material**

- **Supplemental Material 1. Manhattan plots for moderate and vigorous physical activity**
- **Supplemental Material 2. Q-Q plots for moderate and vigorous physical activity**
- **Supplemental Material 3. Parameters estimates corresponding to the top ten competing LHC-MR optimized models with the maximum likelihood**
- **Supplemental Material 4. Standard MR analysis on potential confounders**

Supplemental Material 1. Manhattan plots for moderate and vigorous physical activity

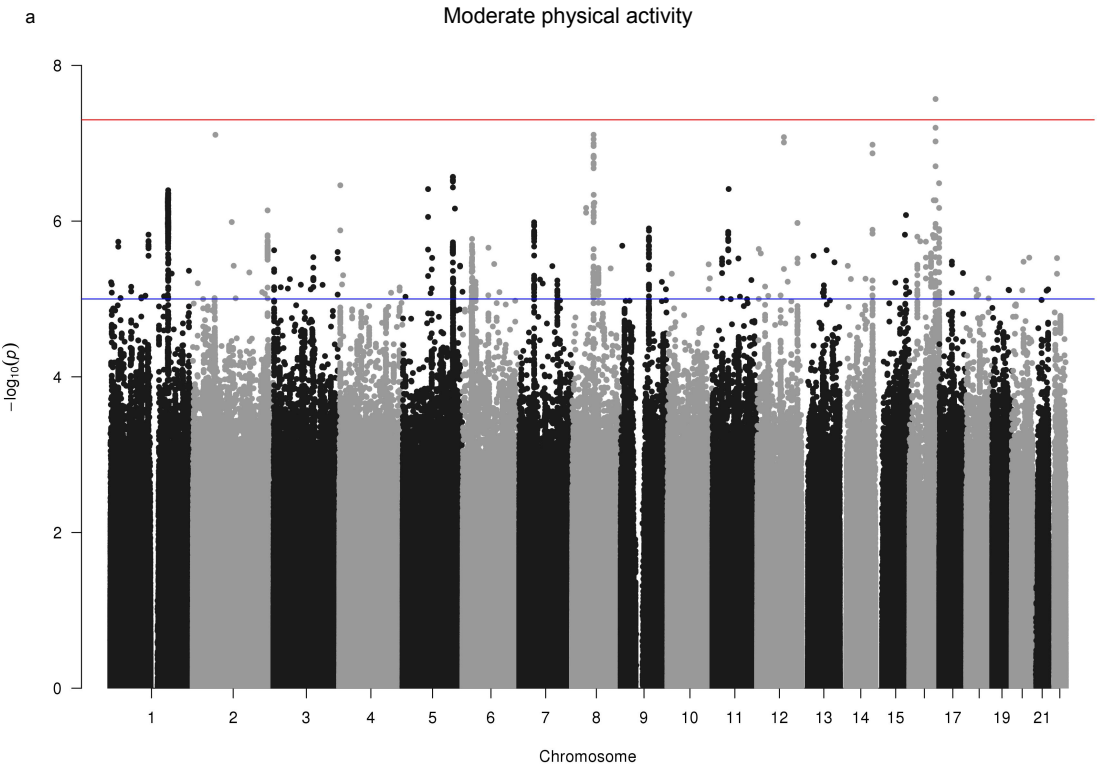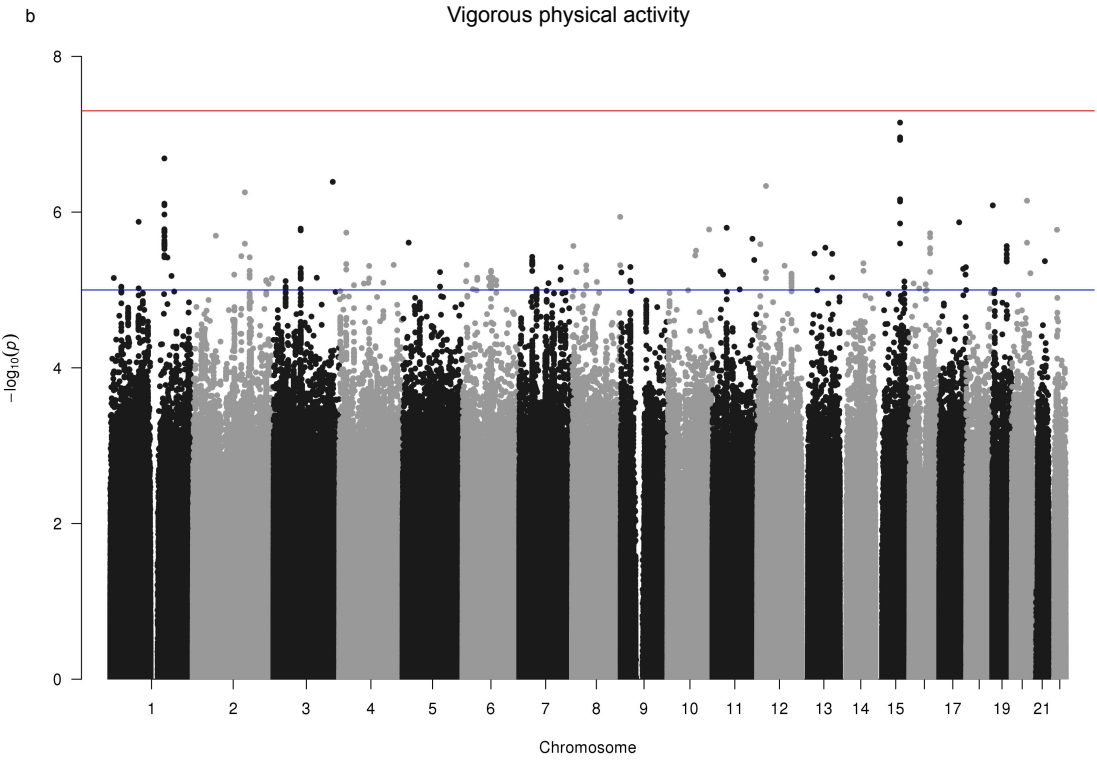

# Supplemental Material 2. Q-Q plots for moderate and vigorous physical activity

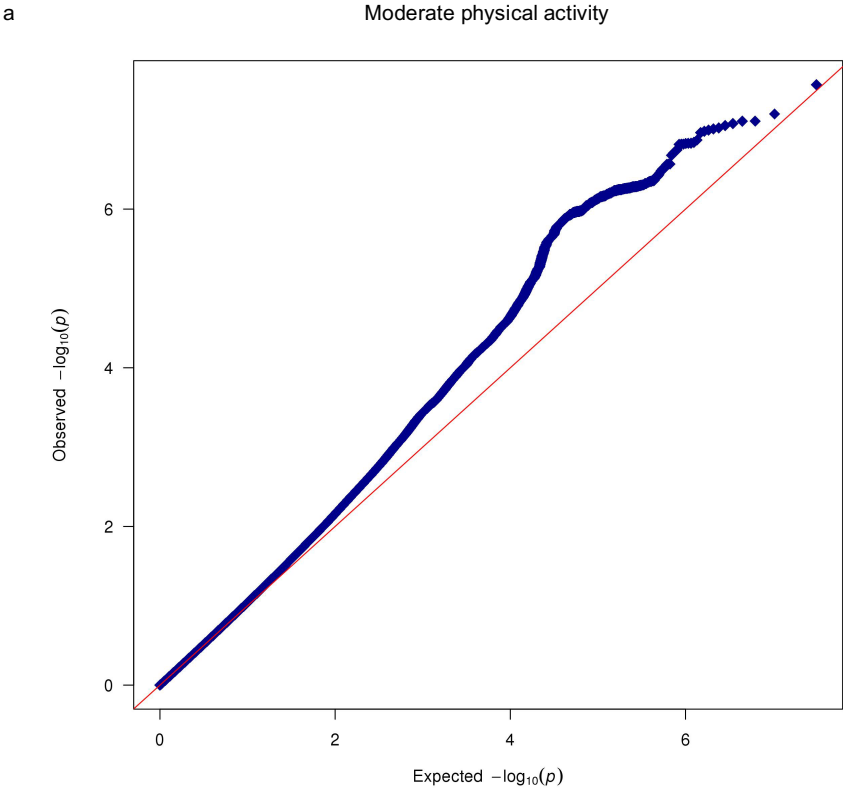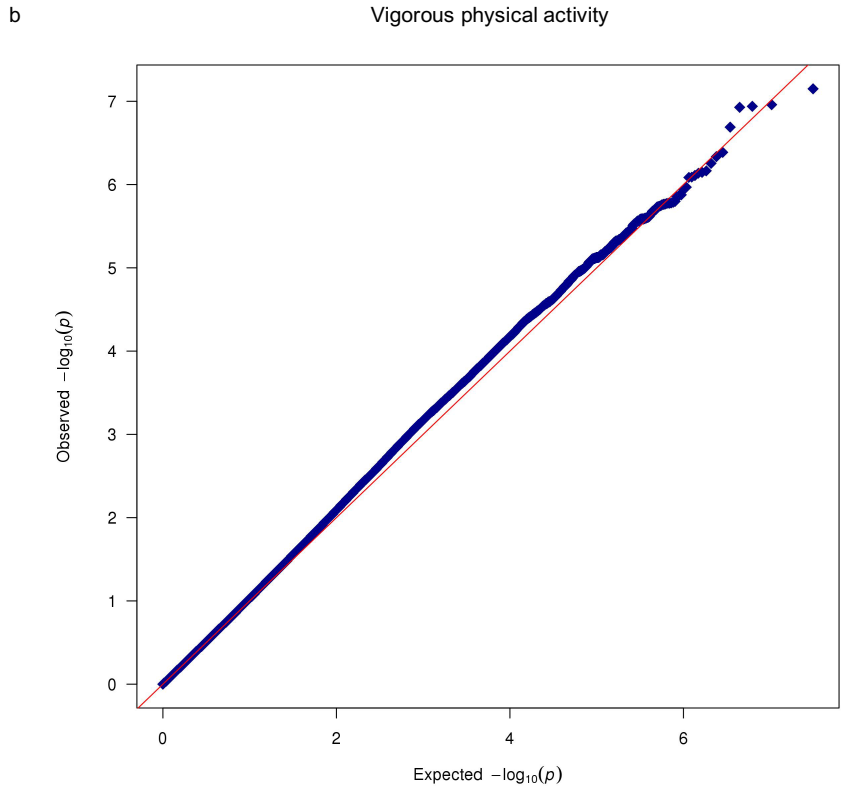

**Supplemental Material 3. Parameters estimates corresponding to the top 10 competing LHC-MR optimized models with the maximum likelihood**

| <b>Minimum log likelihood</b> | <b>h2X</b> | <b>h2Y</b> | <b>tX</b>  | <b>tY</b>  | <b>Y-&gt;X</b> |
|-------------------------------|------------|------------|------------|------------|----------------|
| -412147.3671                  | 0.06281798 | 0.05972831 | 0.55586295 | 0.21994846 | -1.1194312     |
| -412147.3637                  | 0.06660269 | 0.05920051 | 0.55615452 | 0.22445207 | -1.1208508     |
| -412147.324                   | 0.06539105 | 0.06254814 | 0.54331899 | 0.21695751 | -1.0782648     |
| -412147.3004                  | 0.06183298 | 0.05200991 | 0.59744722 | -0.2364826 | 1.33060451     |
| -412147.2961                  | 0.06497437 | 0.06463484 | 0.53530224 | 0.21185777 | -1.0356249     |
| -412147.2948                  | 0.06419906 | 0.06317745 | 0.54240102 | 0.21519858 | -1.0422385     |
| -412147.2623                  | 0.06488136 | 0.04864499 | 0.61077951 | -0.2430935 | 1.40694142     |
| -412147.2596                  | 0.06188799 | 0.04512306 | 0.63443065 | -0.245956  | 1.50326793     |
| -412147.2513                  | 0.06760578 | 0.06494738 | 0.53304795 | 0.21439371 | -1.0055237     |
| -412147.2475                  | 0.06226536 | 0.05414764 | 0.58597942 | -0.233136  | 1.28782801     |

Notes. Heritability on exposure (X) and outcome (Y) shown as h2X and h2Y respectively. The effect of the confounder on X and Y shown as tX and tY respectively. Causal effect from Y to X (Y→X) is also reported, whereas causal effect from X to Y (X→Y) is non-significant.

## Supplemental Material 4. Standard MR analysis on potential confounders

| Exposure                                                        | Outcome | MR method                 | Valid SNPs | Causal estimate | SE     | P-value  |
|-----------------------------------------------------------------|---------|---------------------------|------------|-----------------|--------|----------|
| <b>Educational attainment and general cognitive functioning</b> |         |                           |            |                 |        |          |
| Edu                                                             | CF      | MR Egger                  | 33         | 0.845           | 0.609  | 0.175    |
|                                                                 |         | Weighted median           | 33         | 0.647           | 0.056  | 1.35e-30 |
|                                                                 |         | Inverse variance weighted | 33         | 0.674           | 0.055  | 4.46e-34 |
|                                                                 |         | Simple mode               | 33         | 0.759           | 0.134  | 2.95e-06 |
|                                                                 |         | Weighted mode             | 33         | 0.671           | 0.112  | 1.20e-06 |
| CF                                                              | Edu     | MR Egger                  | 131        | 0.478           | 0.113  | 4.52e-05 |
|                                                                 |         | Weighted median           | 131        | 0.405           | 0.023  | 8.77e-67 |
|                                                                 |         | Inverse variance weighted | 131        | 0.417           | 0.0199 | 7.44e-98 |
|                                                                 |         | Simple mode               | 131        | 0.457           | 0.071  | 2.30e-09 |
|                                                                 |         | Weighted mode             | 131        | 0.443           | 0.076  | 3.56e-08 |

### Educational attainment and Average accelerometer-based physical activity – model 1

|     |     |                           |    |        |       |       |
|-----|-----|---------------------------|----|--------|-------|-------|
| Edu | PA  | MR Egger                  | 34 | 0.560  | 0.755 | 0.463 |
|     |     | Weighted median           | 34 | -0.008 | 0.072 | 0.907 |
|     |     | Inverse variance weighted | 34 | -0.012 | 0.069 | 0.862 |
|     |     | Simple mode               | 34 | 0.100  | 0.162 | 0.543 |
|     |     | Weighted mode             | 34 | 0.0100 | 0.141 | 0.485 |
| PA  | Edu | MR Egger                  | 6  | -1.801 | 1.045 | 0.159 |
|     |     | Weighted median           | 6  | 0.013  | 0.086 | 0.878 |
|     |     | Inverse variance weighted | 6  | 0.032  | 0.107 | 0.766 |
|     |     | Simple mode               | 6  | -0.068 | 0.199 | 0.747 |
|     |     | Weighted mode             | 6  | -0.143 | 0.136 | 0.341 |

### Body mass index and general cognitive functioning

|     |     |                           |     |        |        |          |
|-----|-----|---------------------------|-----|--------|--------|----------|
| BMI | CF  | MR Egger                  | 306 | -0.099 | 0.067  | 0.143    |
|     |     | Weighted median           | 306 | -0.064 | 0.018  | 3.08e-04 |
|     |     | Inverse variance weighted | 306 | -0.122 | 0.0213 | 1.01e-08 |
|     |     | Simple mode               | 306 | 0.038  | 0.071  | 0.594    |
|     |     | Weighted mode             | 306 | 0.019  | 0.037  | 0.607    |
| CF  | BMI | MR Egger                  | 131 | -0.324 | 0.220  | 0.144    |
|     |     | Weighted median           | 131 | -0.116 | 0.022  | 2.04e-07 |
|     |     | Inverse variance weighted | 131 | -0.179 | 0.039  | 3.54e-06 |
|     |     | Simple mode               | 131 | -0.142 | 0.056  | 0.012    |
|     |     | Weighted mode             | 131 | -0.130 | 0.050  | 0.011    |

### Body mass index and Average accelerometer-based physical activity – model 1

|     |     |                           |     |        |       |          |
|-----|-----|---------------------------|-----|--------|-------|----------|
| BMI | PA  | MR Egger                  | 306 | 0.102  | 0.069 | 0.140    |
|     |     | Weighted median           | 306 | -0.126 | 0.027 | 4.11e-06 |
|     |     | Inverse variance weighted | 306 | -0.207 | 0.023 | 4.11e-20 |
|     |     | Simple mode               | 306 | -0.438 | 0.134 | 0.001    |
|     |     | Weighted mode             | 306 | -0.008 | 0.053 | 0.886    |
| PA  | BMI | MR Egger                  | 6   | 1.188  | 1.100 | 0.584    |
|     |     | Weighted median           | 6   | -0.233 | 0.063 | 2.3e-04  |
|     |     | Inverse variance weighted | 6   | -0.277 | 0.163 | 0.089    |

|  |  |               |   |        |       |       |
|--|--|---------------|---|--------|-------|-------|
|  |  | Simple mode   | 6 | -0.466 | 0.099 | 0.005 |
|  |  | Weighted mode | 6 | 0.140  | 0.106 | 0.245 |

**Body mass index and Moderate accelerometer-based physical activity (fraction of acceleration > 100 mg and < 425 mg)**

|            |           |                                  |            |               |              |                 |
|------------|-----------|----------------------------------|------------|---------------|--------------|-----------------|
| <b>BMI</b> | <b>PA</b> | <b>MR Egger</b>                  | <b>306</b> | <b>0.057</b>  | <b>0.068</b> | <b>0.407</b>    |
|            |           | <b>Weighted median</b>           | <b>306</b> | <b>-0.122</b> | <b>0.028</b> | <b>1.16e-05</b> |
|            |           | <b>Inverse variance weighted</b> | <b>306</b> | <b>-0.186</b> | <b>0.022</b> | <b>4.15e-17</b> |
|            |           | <b>Simple mode</b>               | <b>306</b> | <b>-0.150</b> | <b>0.119</b> | <b>0.210</b>    |
|            |           | <b>Weighted mode</b>             | <b>306</b> | <b>-0.025</b> | <b>0.051</b> | <b>0.622</b>    |
| PA         | BMI       | MR Egger                         | 33         | -0.607        | 0.941        | 0.523           |
|            |           | Weighted median                  | 33         | -0.058        | 0.030        | 0.053           |
|            |           | Inverse variance weighted        | 33         | -0.096        | 0.046        | 0.037           |
|            |           | Simple mode                      | 33         | -0.142        | 0.062        | 0.028           |
|            |           | Weighted mode                    | 33         | -0.107        | 0.060        | 0.082           |

**Educational attainment and Moderate accelerometer-based physical activity (fraction of acceleration > 100 mg and < 425 mg)**

|            |           |                                  |           |               |              |              |
|------------|-----------|----------------------------------|-----------|---------------|--------------|--------------|
| <b>Edu</b> | <b>PA</b> | <b>MR Egger</b>                  | <b>34</b> | <b>0.409</b>  | <b>0.601</b> | <b>0.505</b> |
|            |           | <b>Weighted median</b>           | <b>34</b> | <b>-0.070</b> | <b>0.075</b> | <b>0.351</b> |
|            |           | <b>Inverse variance weighted</b> | <b>34</b> | <b>-0.024</b> | <b>0.055</b> | <b>0.672</b> |
|            |           | <b>Simple mode</b>               | <b>34</b> | <b>-0.153</b> | <b>0.162</b> | <b>0.352</b> |
|            |           | <b>Weighted mode</b>             | <b>34</b> | <b>-0.127</b> | <b>0.149</b> | <b>0.401</b> |
| PA         | Edu       | MR Egger                         | 33        | -0.668        | 0.531        | 0.218        |
|            |           | Weighted median                  | 33        | 0.033         | 0.033        | 0.317        |
|            |           | Inverse variance weighted        | 33        | 0.027         | 0.026        | 0.308        |
|            |           | Simple mode                      | 33        | 0.058         | 0.075        | 0.444        |
|            |           | Weighted mode                    | 33        | 0.058         | 0.074        | 0.438        |

Notes. CF = general cognitive functioning; Edu = educational attainment; PA = accelerometer-based physical activity; BMI = body mass index; Causal estimates from 5 standard MR methods on alternating exposure and outcome traits. For moderate physical activity as exposure, the cutoff was decreased to 10e-5 because of the low number of genome wide significant SNPs to use as instruments. The tables required for the investigation of the potential confounders are highlighted in bold.
